# Supplementary material for: School-based peer education interventions to improve health: a global systematic review of effectiveness
Source: PubMed Central journal article supplement (PMC9719233; doi:10.1186/s12889-022-14688-3), 2022-12-02
Supplement: 12889_2022_14688_MOESM1_ESM.pdf [file 12889_2022_14688_MOESM1_ESM.pdf]

Supplementary Material 1: Full table of included study details, effectiveness and quality ratings for peer learner outcomes

| Author, Year        | Study Design                             | Nation | Sample size | Health Area                     | Outcome & effectiveness                                                                                                                                                                                                                                                                                                                                                                                                                                                                                                                                                                                                                                                                                                                                                                                                                                                                                                                                                                                                                                                                                                                                                                                                                                                                                      | Effectiveness | Quality Score | Quality Rating |
|---------------------|------------------------------------------|--------|-------------|---------------------------------|--------------------------------------------------------------------------------------------------------------------------------------------------------------------------------------------------------------------------------------------------------------------------------------------------------------------------------------------------------------------------------------------------------------------------------------------------------------------------------------------------------------------------------------------------------------------------------------------------------------------------------------------------------------------------------------------------------------------------------------------------------------------------------------------------------------------------------------------------------------------------------------------------------------------------------------------------------------------------------------------------------------------------------------------------------------------------------------------------------------------------------------------------------------------------------------------------------------------------------------------------------------------------------------------------------------|---------------|---------------|----------------|
| Aslan & Sahin, 2007 | Non-randomised, pre-post design          | Turkey | 279         | Alcohol, smoking, substance use | <p style="text-align: center;">↑</p> <p style="text-align: center;">Knowledge &amp; attitudes<br/>(See paper for a breakdown of results as reported by the author at the level of multiple individual statements)</p>                                                                                                                                                                                                                                                                                                                                                                                                                                                                                                                                                                                                                                                                                                                                                                                                                                                                                                                                                                                                                                                                                        | Effective     | 2             | Medium         |
| Bloor et al. 1999   | Non-randomised, intervention vs. control | UK     | 1300        | Alcohol, smoking, substance use | <p style="text-align: center;">↔</p> <p style="text-align: center;">Change in smoking behaviour immediately post intervention (<math>p=0.22</math>)</p> <p style="text-align: center;">↑</p> <p style="text-align: center;">Smoking abstinence in ex-smokers (<math>p =0.004</math>)</p>                                                                                                                                                                                                                                                                                                                                                                                                                                                                                                                                                                                                                                                                                                                                                                                                                                                                                                                                                                                                                     | Mixed         | 1             | Low            |
| Botvin et al. 1990  | Randomised, peer-led vs. teacher-led     | USA    | 1185        | Alcohol, smoking, substance use | <p style="text-align: center;">Peer intervention, peer intervention + booster</p> <p style="text-align: center;">↔, ↑</p> <p style="text-align: center;">Smoking use (NS), (<math>&lt;.01</math>)</p> <p style="text-align: center;">↔, ↔</p> <p style="text-align: center;">Alcohol use (NS), (NS)</p> <p style="text-align: center;">↔, ↑</p> <p style="text-align: center;">Marijuana use (NS), (<math>&lt;.05</math>)</p> <p style="text-align: center;">↑, ↑</p> <p style="text-align: center;">Knowledge: Tobacco (<math>p &lt; .0001</math>), (<math>p &lt; .0001</math>)</p> <p style="text-align: center;">↑, ↑</p> <p style="text-align: center;">Knowledge: Alcohol (<math>p &lt; .01</math>), (<math>p &lt; .0001</math>)</p> <p style="text-align: center;">↔, ↔</p> <p style="text-align: center;">Knowledge: Marijuana (NS), (NS)</p> <p style="text-align: center;">↔, ↑</p> <p style="text-align: center;">Attitudes: Tobacco (NS), (<math>p &lt; .01</math>)</p> <p style="text-align: center;">↔, ↔</p> <p style="text-align: center;">Attitudes: Alcohol (NS), (NS)</p> <p style="text-align: center;">↔, ↔</p> <p style="text-align: center;">Marijuana (NS), (NS)</p> <p style="text-align: center;">↔, ↔</p> <p style="text-align: center;">Personality: Assertiveness (NS), (NS)</p> | Ineffective   | 2             | Medium         |

|                       |                                                               |        |        |                                 |                                                                                                                                                                                                                                                                                                                                                                                                                                                                                                                                                  |             |   |        |
|-----------------------|---------------------------------------------------------------|--------|--------|---------------------------------|--------------------------------------------------------------------------------------------------------------------------------------------------------------------------------------------------------------------------------------------------------------------------------------------------------------------------------------------------------------------------------------------------------------------------------------------------------------------------------------------------------------------------------------------------|-------------|---|--------|
|                       |                                                               |        |        |                                 | <p>↔, ↔<br/>Personality: Locus of control (NS), (<math>p &lt; .01</math>)</p> <p>↔, ↑<br/>Personality: Social anxiety (NS), (NS)</p> <p>↔, ↔<br/>Personality: Self-esteem (NS), (NS)</p> <p>↔, ↔<br/>Personality: Smoking influenceability (NS), (NS)</p> <p>↔, ↔<br/>Personality: General influenceability (NS), (NS)</p>                                                                                                                                                                                                                       |             |   |        |
| Campbell et al. 2008  | Cluster randomised controlled trial, intervention vs. control | UK     | 10,730 | Alcohol, smoking, substance use | <p>↑<br/>All students: Smoking prevalence immediately after intervention (<math>p = 0.031</math>)</p>                                                                                                                                                                                                                                                                                                                                                                                                                                            | Effective   | 5 | High   |
| Demirezen et al. 2020 | Non-randomised, pre-post survey                               | Turkey | 663    | Alcohol, smoking, substance use | <p>↑<br/>Knowledge and attitude scores (<math>p &lt; .01</math>)</p> <p>↑ ↔<br/>Incidence of smoking: just once (<math>p &lt; .001</math>), yes (NS)</p> <p>↔ ↔<br/>Incidence of alcohol use: just once (NS), yes (NS)</p> <p>↔ ↔<br/>Incidence of cannabis use: just once (NS), yes (NS)</p> <p>↔ ↔<br/>Incidence of using ecstasy: just once (NS), yes (NS)</p> <p>↔ ↔<br/>Incidence of using volatiles: just once (NS), yes (NS)</p> <p>↑ ↔<br/>Incidence of using non-prescription drugs: just once (<math>p &lt; .001</math>), yes (NS)</p> | Ineffective | 3 | Medium |
| Erhard, 1999          | Non-randomised, peer-led vs. adult-led                        | Israel | 2447   | Alcohol, smoking, substance use | <p>↑<br/>Evaluation of knowledge: (<math>p &lt; .05</math>)</p> <p>↑<br/>Evaluation of motivation: (<math>p &lt; .05</math>)</p> <p>↑</p>                                                                                                                                                                                                                                                                                                                                                                                                        | Effective   | 2 | Medium |

|                          |                                                    |         |      |                                 |                                                                                                                                                                                                                                                                                              |             |   |      |
|--------------------------|----------------------------------------------------|---------|------|---------------------------------|----------------------------------------------------------------------------------------------------------------------------------------------------------------------------------------------------------------------------------------------------------------------------------------------|-------------|---|------|
|                          |                                                    |         |      |                                 | <p>Increased curiosity: (<math>p &lt; .05</math>)<br/> ↑<br/> Facilitators as an address: (<math>p &lt; .05</math>)<br/> ↑<br/> Improved relations: (<math>p &lt; .05</math>)<br/> ↑<br/> Satisfaction: (<math>p &lt; .05</math>)<br/> ↑</p>                                                 |             |   |      |
| LaChause, 2008           | Randomised, intervention vs. control               | USA     | 114  | Alcohol, smoking, substance use | <p>FAS knowledge (<math>p = .01</math>)<br/> ↔<br/> Attitudes toward alcohol use during pregnancy (NS)<br/> ↔<br/> Likelihood to use alcohol during pregnancy (NS)<br/> ↔<br/> Intention to use alcohol during pregnancy (NS)</p>                                                            | Ineffective | 1 | Low  |
| Lotrean et al. 2010      | Randomised, intervention vs. control               | Romania | 1071 | Alcohol, smoking, substance use | <p>Pros of smoking (<math>p &lt; 0.01</math>)<br/> ↔<br/> Cons of smoking (NS)<br/> ↑<br/> Self-efficacy social (<math>p &lt; 0.05</math>)<br/> ↔<br/> Self-efficacy emotional (NS)<br/> ↔<br/> Self-efficacy situational (NS)<br/> ↑<br/> Intention to smoke (<math>p &lt; 0.05</math>)</p> | Mixed       | 4 | High |
| Mall & Bhagyalaxmi, 2017 | Cluster randomised trial, intervention vs. control | India   | 802  | Alcohol, smoking, substance use | <p>↑<br/> Tobacco consumption at follow-up (<math>p &lt; 0.01</math>)</p>                                                                                                                                                                                                                    | Effective   | 1 | Low  |
| Mohammadi et al. 2019    | Cluster randomised trial,                          | Iran    | 1807 | Alcohol, smoking, substance use | <p>↑<br/> Smoking-related knowledge: (<math>p &lt; 0.001</math>)<br/> ↔<br/> Attitude toward smoking : (<math>p = 0.124</math>)</p>                                                                                                                                                          | Effective   | 4 | High |

|                      |                                            |                                                       |                                |                                 |                                                                                                                                                                                                                                                                 |             |   |        |
|----------------------|--------------------------------------------|-------------------------------------------------------|--------------------------------|---------------------------------|-----------------------------------------------------------------------------------------------------------------------------------------------------------------------------------------------------------------------------------------------------------------|-------------|---|--------|
|                      | intervention vs. control                   |                                                       |                                |                                 | <p>↑<br/>Normative beliefs: (<math>p &lt; 0.001</math>)</p> <p>↑<br/>Intention to tobacco use: (<math>p = &lt; 0.013</math>)</p> <p>↔</p>                                                                                                                       |             |   |        |
| Murray et al. 1987   | Non-randomised, pre-post survey            | USA                                                   | Study 1: 3154<br>Study 2: 3820 | Alcohol, smoking, substance use | <p>↑<br/>Reduced smoking incidence at 1 year</p> <p>↑<br/>Smoking intensity levels at 1 year</p> <p>↑<br/>Peer-led social influence condition</p>                                                                                                               | Effective   | 2 | Medium |
| Perry et al. 1980    | Non-randomised, intervention vs. control   | USA                                                   | 707                            | Alcohol, smoking, substance use | <p>↑<br/>Smoked in past week</p> <p>↑<br/>Smoked in past month</p>                                                                                                                                                                                              | Effective   | 4 | High   |
| Perry et al. 1989    | Randomised, peer-led, teacher-led, control | Multinational (Australia, Chile, Norway, Switzerland) | 2536                           | Alcohol, smoking, substance use | <p>↑<br/>Alcohol use (<math>p &lt; .005</math>)</p> <p>↑<br/>Knowledge (<math>p &lt; .005</math>)</p> <p>↑<br/>Attitudes (<math>p &lt; .005</math>)</p> <p>↓<br/>Skills (<math>p &lt; .08</math>)</p> <p>↑<br/>Friends' Drinking (<math>p &lt; .005</math>)</p> | Effective   | 2 | Medium |
| Severson et al. 1991 | Randomised, peer-led vs. teacher-led       | USA                                                   | 1768                           | Alcohol, smoking, substance use | <p>↑<br/>Smokeless tobacco use in males (<math>p &lt; 0.05</math>)</p> <p>↑<br/>Smokeless tobacco cessation rate</p> <p>↔<br/>Cigarette Smoking (NS)</p> <p>↓<br/>Carbon monoxide level (<math>p &lt; 0.05</math>)</p> <p>↔<br/>Alcohol use (NS)</p>            | Ineffective | 4 | High   |

|                              |                                                                |           |     |                                 |                                                                                                                                                                                      |             |   |        |
|------------------------------|----------------------------------------------------------------|-----------|-----|---------------------------------|--------------------------------------------------------------------------------------------------------------------------------------------------------------------------------------|-------------|---|--------|
|                              |                                                                |           |     |                                 | ↔<br>Marijuana use (NS)<br>↓                                                                                                                                                         |             |   |        |
|                              |                                                                |           |     |                                 | Alcohol consumption – higher in peer-led condition compared to teacher-led ( $p < .05$ for T2) than in control ( $p < .01$ for T2).<br>↓                                             |             |   |        |
|                              |                                                                |           |     |                                 | Frequency of drinking - higher in peer-led condition compared to teacher-led condition ( $p < .001$ for T2)<br>↓                                                                     |             |   |        |
| Weichold & Silbereisen, 2012 | Randomised, peer-led, teacher-led, control                     | Germany   | 105 | Alcohol, smoking, substance use | Cigarette consumption – lower in students of the teacher-led condition compared to peer-led condition ( $p < .05$ for T2 and to those of the control group ( $p < .01$ for T2).<br>↓ | Ineffective | 2 | Medium |
|                              |                                                                |           |     |                                 | Resistance skills - lower in the peer-led intervention ( $p < .05$ for T2) compared to control group ( $p < .05$ for T2)<br>↓                                                        |             |   |        |
| Al-Sheyab et al. 2012        | Cluster randomised controlled trial, intervention vs. control  | USA       | 240 | Asthma                          | Health-related quality of life ( $p < .05$ )<br>↑<br>Self-efficacy to resist smoking ( $p < .05$ )<br>↑<br>Knowledge of asthma self-management ( $p < .05$ )<br>↑                    | Effective   | 2 | Medium |
| Al-Sheyab et al. 2016        | Cluster, randomised controlled trial, intervention vs. control | USA       | 486 | Asthma                          | Smoking related knowledge ( $p < 0.001$ )<br>↑<br>Level of nicotine dependence ( $p < 0.001$ )<br>↑<br>Asthmas control scores ( $p < 0.001$ )<br>↑                                   | Effective   | 2 | Medium |
| Gibson et al. 1998           | Controlled trial,                                              | Australia | 935 | Asthma                          | Mean scores of asthma Knowledge ( $p < 0.001$ )<br>↑                                                                                                                                 | Effective   | 3 | Medium |

|                       |                                                               |           |                              |                    |                                                                                                                                                                                                           |             |   |        |
|-----------------------|---------------------------------------------------------------|-----------|------------------------------|--------------------|-----------------------------------------------------------------------------------------------------------------------------------------------------------------------------------------------------------|-------------|---|--------|
|                       | intervention vs. control                                      |           |                              |                    |                                                                                                                                                                                                           |             |   |        |
| McCallum et al. 2017  | Non-randomised, pre – post survey                             | Australia | 203                          | Asthma             | ↔<br>'Asthma control test score: no change                                                                                                                                                                | Ineffective | 2 | Medium |
| Shah et al. 2001      | Cluster randomised controlled trial, intervention vs. control | Australia | 272                          | Asthma             | ↑<br>Quality of life ( $p=0.01$ )<br>↑<br>Activities domain ( $p=0.028$ )<br>↑<br>Emotions domain (males only), ( $p=0.02$ )<br>↑<br>School 6bsenteeism ( $p<.05$ )<br>↔<br>Asthma attacks at school (NS) | Effective   | 3 | Medium |
| Palladino et al. 2016 | Non-randomised, intervention vs. control                      | Italy     | Trial 1: 622<br>Trial 2: 461 | Bullying           | ↑<br>Victimization: ( $p=.003$ )<br>↑<br>Bullying – ( $p=.010$ )<br>↑<br>Cybervictimization – ( $p=0.002$ )<br>↑<br>Cyberbullying – ( $p=0.009$ )                                                         | Effective   | 4 | High   |
| Isik et al. 2013      | Non-randomised, cross-sectional survey                        | Turkey    | 2829                         | Disease prevention | ↑<br>Intention to participate in BB rituals ( $p<0.001$ )                                                                                                                                                 | Effective   | 3 | Medium |
| Sadoh et al. 2018     | Non-randomised, pre-post survey                               | Nigeria   | 1443                         | Disease prevention | ↑<br>Awareness of cervical cancer<br>↑<br>Knowledge of risk factors and cause of cervical cancer                                                                                                          | Effective   | 2 | Medium |
| Acemoglu, 2011        | Non-randomised,                                               | Turkey    | 2930                         | Disease prevention | ↑<br>Knowledge scores ( $p=0.001$ )                                                                                                                                                                       | Effective   | 1 | Low    |

|                       |                                                      |         |      |                    |                                                                                                                                                                                                                                                                                                                          |           |   |        |
|-----------------------|------------------------------------------------------|---------|------|--------------------|--------------------------------------------------------------------------------------------------------------------------------------------------------------------------------------------------------------------------------------------------------------------------------------------------------------------------|-----------|---|--------|
|                       | pre-post survey                                      |         |      |                    | ↑<br>Attitudes of students towards people infected with hepatitis virus ( $p=0.002$ )<br>↑<br>Change in behaviours ( $p=0.000$ )                                                                                                                                                                                         |           |   |        |
| Liu et al. 2015       | Randomised, peer-led vs. teacher-led                 | China   | 1265 | Disease prevention | ↑<br>Pre-post knowledge, attitude & practice<br>↓<br>Knowledge, attitude & practice (larger improvement in teacher-led, $p<.01$ )                                                                                                                                                                                        | Mixed     | 3 | Medium |
| Ajuwon & Ajuwon, 2019 | Non-randomised, pre-post survey                      | Nigeria | 120  | Healthy lifestyles | ↑<br>Knowledge of CHI resources<br>↑<br>Understanding of roles as peer educators                                                                                                                                                                                                                                         | Effective | 2 | Medium |
| Bell et al. 2017      | Randomised, intervention vs. control                 | UK      | 928  | Healthy lifestyles | ↑<br>Consumption of breakfast ( $p=0.004$ )<br>↔<br>Consumption of at least three portions of fruit a day ( $p=0.055$ )<br>↔<br>No statistically significant difference in the reported consumption of other target foods<br>↑<br>Counts per minute (CPM)<br>↑<br>Sedentary minutes per day<br>↔<br>MVPA minutes per day | Mixed     | 4 | High   |
| Bogart et al. 2014    | Randomised trial, intervention vs. wait-list control | USA     | 2997 | Healthy lifestyles | ↑<br>Fruit servings ( $p<.10$ )<br>↔<br>Vegetable servings: ns<br>↑<br>All lunches ( $p<.01$ )<br>↑<br>Free/reduced lunch ( $p<.001$ )                                                                                                                                                                                   | Effective | 4 | High   |

|                    |                                                      |       |      |                    |                                                                                                                                                                                                                                                                                                                                                                                                                                                                                                                   |             |   |        |
|--------------------|------------------------------------------------------|-------|------|--------------------|-------------------------------------------------------------------------------------------------------------------------------------------------------------------------------------------------------------------------------------------------------------------------------------------------------------------------------------------------------------------------------------------------------------------------------------------------------------------------------------------------------------------|-------------|---|--------|
|                    |                                                      |       |      |                    | <p>↑<br/>Full-price lunch (<math>p &lt; .01</math>)<br/>↑<br/>Cafeteria attitudes (<math>p &lt; .05</math>)<br/>↑<br/>Tap water attitudes (<math>p &lt; .05</math>)<br/>↑<br/>Knowledge about healthy eating/physical activity<br/>(<math>p &lt; .05</math>)<br/>↑<br/>Intentions to drink tap water (<math>p &lt; .05</math>)<br/>↑<br/>Intentions to drink from refillable bottled (<math>p &lt; .05</math>)<br/>↑<br/>Tap water consumption (<math>p &lt; .05</math>)<br/>↔<br/>Refillable bottle use (NS)</p> |             |   |        |
| Bogart et al. 2016 | Randomised trial, intervention vs. wait-list control | USA   | 4576 | Healthy lifestyles | <p>↑<br/>Students obese at seventh grade (<math>p &lt; .01</math>)<br/>↔<br/>Students overweight at seventh grade (no intervention effect)<br/>↔<br/>Students healthy weight/ underweight at seventh grade (no intervention effect)</p>                                                                                                                                                                                                                                                                           | Ineffective | 2 | Medium |
| Cohen et al. 1989  | Non-randomised, peer-led vs. teacher-led             | USA   | 886  | Healthy lifestyles | <p>↔<br/>Blood pressure behavioural capabilities (NS)<br/>↔<br/>Smoking experimentation (NS)<br/>↔<br/>Nutrition behavioural capabilities (NS)<br/>↔<br/>Family discussion (NS)</p>                                                                                                                                                                                                                                                                                                                               | Ineffective | 3 | Medium |
| Cui et al. 2012    | Randomised, intervention vs. control                 | China | 682  | Healthy lifestyles | <p>↔<br/>Decrease in time spent on sedentary behaviour: 3 months (<math>p = 0.21</math>)<br/>↔</p>                                                                                                                                                                                                                                                                                                                                                                                                                | Ineffective | 3 | Medium |



|                     |                                                |     |     |                    |                                                                                                        |             |   |     |
|---------------------|------------------------------------------------|-----|-----|--------------------|--------------------------------------------------------------------------------------------------------|-------------|---|-----|
|                     |                                                |     |     |                    | Decrease in time spent on sedentary behaviour on weekdays: 3 months ( $p = 0.21$ )                     |             |   |     |
|                     |                                                |     |     |                    | ↔                                                                                                      |             |   |     |
|                     |                                                |     |     |                    | Decrease in time spent on sedentary behaviour on weekends: 3 months ( $p = 0.25$ )                     |             |   |     |
|                     |                                                |     |     |                    | ↔,                                                                                                     |             |   |     |
|                     |                                                |     |     |                    | Time spent on computer: 3 months: ( $p = 0.13$ )                                                       |             |   |     |
|                     |                                                |     |     |                    | ↔                                                                                                      |             |   |     |
|                     |                                                |     |     |                    | Time spent on computer on weekdays: 3 months - ( $p = 0.07$ )                                          |             |   |     |
|                     |                                                |     |     |                    | ↔                                                                                                      |             |   |     |
|                     |                                                |     |     |                    | Time spent on computer on weekend: 3 months ( $p = 0.27$ )                                             |             |   |     |
|                     |                                                |     |     |                    | ↔                                                                                                      |             |   |     |
|                     |                                                |     |     |                    | Time spent on Television and DVD: 3 months ( $p = 0.13$ )                                              |             |   |     |
|                     |                                                |     |     |                    | ↔                                                                                                      |             |   |     |
|                     |                                                |     |     |                    | Time spent on Video games: 3 months ( $p = 0.26$ )                                                     |             |   |     |
|                     |                                                |     |     |                    | ↔                                                                                                      |             |   |     |
|                     |                                                |     |     |                    | Time spent on extracurricular reading, writing, drawing and listening to music: 3 months ( $p = 0.4$ ) |             |   |     |
|                     |                                                |     |     |                    | ↔                                                                                                      |             |   |     |
|                     |                                                |     |     |                    | Time spent on passive commuting: 3 months ( $p = 0.22$ )                                               |             |   |     |
|                     |                                                |     |     |                    | ↔                                                                                                      |             |   |     |
|                     |                                                |     |     |                    | Time spent sitting and talking: 3 months ( $p = 0.16$ )                                                |             |   |     |
|                     |                                                |     |     |                    | ↑                                                                                                      |             |   |     |
|                     |                                                |     |     |                    | Self-Efficacy to Eat Healthy ( $p < .05$ )                                                             |             |   |     |
|                     |                                                |     |     |                    | ↔                                                                                                      |             |   |     |
| Forneris et al 2010 | Randomised, intervention vs. wait-list control | USA | 523 | Healthy lifestyles | Perceived Taste of Low-Fat Foods "not significant"                                                     | Ineffective | 1 | Low |
|                     |                                                |     |     |                    | ↑                                                                                                      |             |   |     |
|                     |                                                |     |     |                    | Fat and Fiber Knowledge ( $p < .003$ )                                                                 |             |   |     |
|                     |                                                |     |     |                    | ↔                                                                                                      |             |   |     |
|                     |                                                |     |     |                    | Fat Food Frequency Score ( $p = .98$ )                                                                 |             |   |     |
|                     |                                                |     |     |                    | ↔                                                                                                      |             |   |     |
|                     |                                                |     |     |                    | Fiber Food Frequency Score ( $p = .89$ )                                                               |             |   |     |

|                     |                                                                           |          |      |                    |                                                                                                                                                                                                  |             |   |      |
|---------------------|---------------------------------------------------------------------------|----------|------|--------------------|--------------------------------------------------------------------------------------------------------------------------------------------------------------------------------------------------|-------------|---|------|
|                     |                                                                           |          |      |                    | ↔<br>Fruit and Vegetable Food Frequency Score ( $p = .76$ )                                                                                                                                      |             |   |      |
| Haleem et al. 2012  | Cluster randomised controlled trial, per-led, dentist-led and teacher-led | Pakistan | 1657 | Healthy lifestyles | ↔<br>Oral health knowledge (NS)<br>↔<br>Oral hygiene status (NS)<br>↑<br>Oral health behaviour ( $p < 0.05$ )                                                                                    | Ineffective | 5 | High |
| Ishak et al. 2019   | Non-randomised, intervention vs. control                                  | Malaysia | 76   | Healthy lifestyles | ↑<br>Knowledge score at time interval one ( $p = 0.006$ )<br>↑<br>Knowledge score at time interval two ( $p = 0.005$ )                                                                           | Effective   | 4 | High |
| Lytle et al. 2004   | Group-randomised trial, intervention vs. control                          | USA      | 2883 | Healthy lifestyles | ↔<br>Scores for total fruit and veg ( $p = .11$ )<br>↔<br>Scores for energy from total fat ( $p = .90$ )<br>↑<br>Food choice score ( $p = p = .01$ )                                             | Ineffective | 4 | High |
| Ping et al. 2014    | Cluster randomised control trial, intervention vs. control                | China    | 645  | Healthy lifestyles | ↑<br>Sun safe knowledge ( $p < .001$ )                                                                                                                                                           | Effective   | 4 | High |
| Sebire et al. 2018  | Cluster randomised controlled trial, intervention vs. control             | UK       | 427  | Healthy lifestyles | ↔<br>Mean weekday moderate-to-vigorous physical activity<br>↔<br>Mean weekend moderate-to-vigorous physical activity<br>↑<br>Mean weekday sedentary (mins)<br>↔<br>Mean weekend sedentary (mins) | Ineffective | 5 | High |
| Shankar et al. 2020 | Non-randomised,                                                           | India    | 755  | Healthy lifestyles | ↑<br>Health knowledge ( $p < 0.001$ )                                                                                                                                                            | Effective   | 1 | Low  |

|                        |                                                              |           |      |                    |                                                                                                                                                                                                                                                                                                                                                                                                 |             |   |        |
|------------------------|--------------------------------------------------------------|-----------|------|--------------------|-------------------------------------------------------------------------------------------------------------------------------------------------------------------------------------------------------------------------------------------------------------------------------------------------------------------------------------------------------------------------------------------------|-------------|---|--------|
|                        | pre-post survey                                              |           |      |                    | ↑<br>Health-related attitudes ( $p < 0.001$ )                                                                                                                                                                                                                                                                                                                                                   |             |   |        |
| Shrewsbury et al. 2020 | Non-randomised, pre-post survey                              | Australia | 2056 | Healthy lifestyles | ↔ ↑<br>Daily breakfast (behaviour, $p = .675$ , intention, $p < .05$ )<br>↑ ↑<br>Fruit $\geq 2$ serves/day (behaviour, $p < .001$ ), intention, $p < .001$ )<br>↔ ↑<br>Vegetables $\geq 5$ serves/day (behaviour, $p = .156$ , intention, $p < .01$ )<br>↑<br><1 cup/day SSB (behaviour, $p < .001$ .)<br>↔ ↑<br>Screen-time $\leq 2$ hours/day (behaviour, $p < .01$ , intention, $p < .001$ ) | Effective   | 5 | High   |
| Tamiru et al. 2017     | Non-randomised, pre-post survey                              | Ethiopia  | 992  | Healthy lifestyles | ↔<br>Dietary diversity score ( $p = 0.093$ )<br>↔<br>Food variety score ( $p = 0.075$ )<br>↑<br>Animal source food intake ( $p < 0.001$ )                                                                                                                                                                                                                                                       | Ineffective | 1 | Low    |
| Vangipuram et al. 2016 | Randomised controlled trial, peer-led, dentist-led & control | India     | 450  | Healthy lifestyles | ↑<br>Oral health knowledge<br>↑<br>Attitude<br>↑<br>Oral hygiene practices<br>↑<br>Oral health status<br>↑<br>Oral health behaviour                                                                                                                                                                                                                                                             | Effective   | 1 | Low    |
| Ciao et al. 2015       | Non-randomised, intervention                                 | USA       | 50   | Mental health      | ↑<br>Internalization ( $p < 0.001$ )<br>↑                                                                                                                                                                                                                                                                                                                                                       | Effective   | 3 | Medium |

|                        |                                                           |           |     |               |                                                       |             |   |        |
|------------------------|-----------------------------------------------------------|-----------|-----|---------------|-------------------------------------------------------|-------------|---|--------|
|                        | vs. wait-list control                                     |           |     |               | Body dissatisfaction ( $p < 0.005$ )                  |             |   |        |
|                        |                                                           |           |     |               | ↑                                                     |             |   |        |
|                        |                                                           |           |     |               | Eating pathology ( $p < 0.012$ )                      |             |   |        |
|                        |                                                           |           |     |               | ↑                                                     |             |   |        |
|                        |                                                           |           |     |               | Understanding of key terms ( $p < 0.001$ )            |             |   |        |
|                        |                                                           |           |     |               | ↑                                                     |             |   |        |
|                        |                                                           |           |     |               | Key skills ( $p < 0.001$ )                            |             |   |        |
|                        |                                                           |           |     |               | ↑                                                     |             |   |        |
|                        |                                                           |           |     |               | Confidence to talk about mental health ( $p = 0.03$ ) |             |   |        |
|                        |                                                           |           |     |               | ↔                                                     |             |   |        |
| Eisenstein et al. 2019 | Non-randomised, pre-post survey                           | UK        | 950 | Mental health | Knowledge of information and resources ( $p = 0.07$ ) | Effective   | 2 | Medium |
|                        |                                                           |           |     |               | ↑                                                     |             |   |        |
|                        |                                                           |           |     |               | Readiness to support others ( $p < 0.001$ )           |             |   |        |
|                        |                                                           |           |     |               | ↑                                                     |             |   |        |
|                        |                                                           |           |     |               | Emotional difficulties ( $p = 0.005$ )                |             |   |        |
|                        |                                                           |           |     |               | ↔                                                     |             |   |        |
|                        |                                                           |           |     |               | Behavioural difficulties ( $p = 0.10$ )               |             |   |        |
|                        |                                                           |           |     |               | ↑                                                     |             |   |        |
|                        |                                                           |           |     |               | School climate ( $p < 0.001$ )                        |             |   |        |
|                        |                                                           |           |     |               | ↑                                                     |             |   |        |
|                        |                                                           |           |     |               | Pro bully attitude ( $p < .05$ )                      |             |   |        |
|                        |                                                           |           |     |               | ↔                                                     |             |   |        |
|                        |                                                           |           |     |               | Pro victim attitude (NS)                              |             |   |        |
|                        |                                                           |           |     |               | ↑                                                     |             |   |        |
|                        |                                                           |           |     |               | Honesty/trustworthiness: ( $p < .05$ )                |             |   |        |
|                        |                                                           |           |     |               | ↔                                                     |             |   |        |
| Ellis 2009             | Non-randomised, pre-post survey, intervention vs. control | Australia | 483 | Mental health | Self Confidence (NS)                                  | Ineffective | 4 | High   |
|                        |                                                           |           |     |               | ↔                                                     |             |   |        |
|                        |                                                           |           |     |               | Global self esteem (NS)                               |             |   |        |
|                        |                                                           |           |     |               | ↔                                                     |             |   |        |
|                        |                                                           |           |     |               | Self-efficacy (NS)                                    |             |   |        |
|                        |                                                           |           |     |               | ↔                                                     |             |   |        |
|                        |                                                           |           |     |               | Same sex relations (NS)                               |             |   |        |
|                        |                                                           |           |     |               | ↑                                                     |             |   |        |
|                        |                                                           |           |     |               | Opposite-sex relations ( $p < .01$ )                  |             |   |        |

|                    |                                                               |      |     |               |                                                                                 |           |   |        |
|--------------------|---------------------------------------------------------------|------|-----|---------------|---------------------------------------------------------------------------------|-----------|---|--------|
|                    |                                                               |      |     |               | ↔                                                                               |           |   |        |
|                    |                                                               |      |     |               | Cooperative teamwork (NS)                                                       |           |   |        |
|                    |                                                               |      |     |               | ↑                                                                               |           |   |        |
|                    |                                                               |      |     |               | Self-esteem general scale ( $p < 0.001$ )                                       |           |   |        |
|                    |                                                               |      |     |               | ↑                                                                               |           |   |        |
|                    |                                                               |      |     |               | Academic scale ( $p < 0.001$ )                                                  |           |   |        |
|                    |                                                               |      |     |               | ↑                                                                               |           |   |        |
|                    |                                                               |      |     |               | Social scale ( $p < 0.001$ )                                                    |           |   |        |
|                    |                                                               |      |     |               | ↔                                                                               |           |   |        |
|                    |                                                               |      |     |               | Family scale ( $p = 0.529$ )                                                    |           |   |        |
|                    |                                                               |      |     |               | ↑                                                                               |           |   |        |
|                    |                                                               |      |     |               | Body scale ( $p < 0.001$ )                                                      |           |   |        |
|                    |                                                               |      |     |               | ↑                                                                               |           |   |        |
|                    |                                                               |      |     |               | Total scale ( $p < 0.001$ )                                                     |           |   |        |
|                    |                                                               |      |     |               | ↑                                                                               |           |   |        |
|                    |                                                               |      |     |               | Confidence in identifying peers with depression ( $p < .001$ )                  |           |   |        |
|                    |                                                               |      |     |               | ↑                                                                               |           |   |        |
|                    |                                                               |      |     |               | Confidence in referring peers with depression ( $p < .001$ )                    |           |   |        |
|                    |                                                               |      |     |               | ↔                                                                               |           |   |        |
|                    |                                                               |      |     |               | Knowing whether to tell someone if a friend informs them they are suicidal (NS) |           |   |        |
|                    |                                                               |      |     |               | ↑                                                                               |           |   |        |
|                    |                                                               |      |     |               | Feelings about visiting school social worker/psychologist: ( $p < .001$ )       |           |   |        |
|                    |                                                               |      |     |               | ↑                                                                               |           |   |        |
|                    |                                                               |      |     |               | Depression knowledge questions: ( $p < .001$ )                                  |           |   |        |
|                    |                                                               |      |     |               | ↑                                                                               |           |   |        |
|                    |                                                               |      |     |               | Knowledge of depression symptoms: ( $p < .001$ )                                |           |   |        |
|                    |                                                               |      |     |               | ↔                                                                               |           |   |        |
|                    |                                                               |      |     |               | Attitudes to a new student with depression: ns                                  |           |   |        |
|                    |                                                               |      |     |               | ↑                                                                               |           |   |        |
|                    |                                                               |      |     |               | Comfort speaking to other students about mental health ( $p < 0.001$ )          |           |   |        |
| Kaveh et al. 2014  | Cluster randomised controlled trial, intervention vs. control | Iran | 223 | Mental health |                                                                                 | Effective | 3 | Medium |
| Parikh et al. 2018 | Non-randomised, pre-post survey                               | USA  | 878 | Mental health |                                                                                 | Effective | 1 | Low    |

|                       |                                                           |        |      |               |                                                                                                                                                                                                                                                                                                                                                                                                                                                                                          |           |   |        |
|-----------------------|-----------------------------------------------------------|--------|------|---------------|------------------------------------------------------------------------------------------------------------------------------------------------------------------------------------------------------------------------------------------------------------------------------------------------------------------------------------------------------------------------------------------------------------------------------------------------------------------------------------------|-----------|---|--------|
|                       |                                                           |        |      |               | ↑<br>Willingness to confide in authority figures<br>( $p < 0.01$ )                                                                                                                                                                                                                                                                                                                                                                                                                       |           |   |        |
| Aten et al.<br>2002   | Non-randomised controlled trial, intervention vs. control | USA    | 1352 | Sex education | Sexual activity at follow-up for students who were abstinent at pretest:<br>↔<br>Females: ( $p = 0.07$ )<br>↑<br>Males: ( $p = 0.04$ )                                                                                                                                                                                                                                                                                                                                                   | Mixed     | 3 | Medium |
| Borgia et al.<br>2005 | Randomised controlled trial, peer-led vs. teacher-led     | Italy  | 1295 | Sex education | ↑↑↑↑<br>Pre-post: Skills, knowledge, attitudes, risk perception ( $p < 0.05$ )<br>↔↑↔↔<br>Between arms: Skills, knowledge, attitudes, risk perception ( $p < 0.05$ )                                                                                                                                                                                                                                                                                                                     | Effective | 4 | High   |
| Caron et al.<br>2004  | Non-randomised, intervention vs. control                  | Canada | 1004 | Sex education | ↑<br>Postponing sexual intercourse: Intention ( $p = 0.001$ )<br>↑<br>Postponing sexual intercourse: Attitude direct ( $p < 0.001$ )<br>↑<br>Postponing sexual intercourse: Attitude indirect ( $p < 0.001$ )<br>↑<br>Postponing sexual intercourse: Perceived self-efficacy ( $p < 0.001$ )<br>↑<br>Postponing sexual intercourse: Role beliefs ( $p < 0.001$ )<br>↑<br>Postponing sexual intercourse: Anticipated regret ( $p < 0.001$ )<br>↑<br>Condom use: intention ( $p < 0.001$ ) | Effective | 3 | Medium |

|                       |                                                                                |       |      |               |                                                                                                                                                                                                                                                                                                                                                                                                                                                                                                                                                                                                                                                        |                                                                                                                               |   |                                                                                                                       |
|-----------------------|--------------------------------------------------------------------------------|-------|------|---------------|--------------------------------------------------------------------------------------------------------------------------------------------------------------------------------------------------------------------------------------------------------------------------------------------------------------------------------------------------------------------------------------------------------------------------------------------------------------------------------------------------------------------------------------------------------------------------------------------------------------------------------------------------------|-------------------------------------------------------------------------------------------------------------------------------|---|-----------------------------------------------------------------------------------------------------------------------|
| Fisher et al.<br>2002 | Quasi-experimental controlled trial, classroom-based, peer-based and combined. | USA   | 1577 | Sex education | <p>↑<br/>Condom use: roles beliefs (<math>p &lt; 0.001</math>)</p> <p><b>Information</b></p> <p>↔<br/>sexually inexperienced (NS)</p> <p>↑<br/>sexually experienced (<math>p &lt; .01</math>)</p> <p><b>Attitudes</b></p> <p>↔<br/>sexually inexperienced (NS)</p> <p>↑<br/>sexually experienced: (<math>p &lt; .01</math>)</p> <p><b>Norms</b></p> <p>↔<br/>sexually inexperienced (NS)</p> <p>↔<br/>sexually experienced (NS)</p> <p>Intentions</p> <p>↔<br/>sexually inexperienced (NS)</p> <p>↔<br/>sexually experienced (NS)</p> <p><b>Behavioural skills</b></p> <p>↔<br/>sexually inexperienced (NS)</p> <p>↔<br/>sexually experienced (NS)</p> | <p style="background-color: #c8e6c9; padding: 2px;">↑</p> <p style="background-color: #e57373; padding: 2px;">Ineffective</p> | 1 | <p style="background-color: #fff9c4; padding: 2px;">↑</p> <p style="background-color: #e57373; padding: 2px;">Low</p> |
| Huang et al.<br>2008  | Randomised, peer-led vs. teacher-led                                           | China | 3068 | Sex education | <p>↑<br/>HIV-related knowledge (<math>p &lt; 0.001</math>)</p> <p>↑<br/>Attitudes (<math>p &lt; 0.001</math>)</p> <p>↑<br/>Behaviour intention (<math>p &lt; 0.05</math>)</p>                                                                                                                                                                                                                                                                                                                                                                                                                                                                          | <p style="background-color: #c8e6c9; padding: 2px;">Effective</p>                                                             | 3 | <p style="background-color: #fff9c4; padding: 2px;">Medium</p>                                                        |

|                                    |                                          |              |      |               |                                                                                                                                                                                                                                                                                |             |   |        |
|------------------------------------|------------------------------------------|--------------|------|---------------|--------------------------------------------------------------------------------------------------------------------------------------------------------------------------------------------------------------------------------------------------------------------------------|-------------|---|--------|
| Jennings et al. 2014               | Non-randomised intervention vs. control  | USA          | 157  | Sex education | <p style="text-align: center;">↓<br/> Knowledge (p=0.10)<br/> ↓<br/> Parental communication (p=0.46)<br/> ↓<br/> Self-efficacy (p=0.06)<br/> ↓<br/> Sexual health information (p=0.06)<br/> ↑<br/> Opportunity to practice skills (p=0.01)<br/> ↑<br/> Intentions (p=0.04)</p> | Ineffective | 4 | High   |
| Mahat et al. 2010                  | Non-randomised, pre-post survey          | USA          | 106  | Sex education | <p style="text-align: center;">↑<br/> Mean score of total HIV/AIDS knowledge (p &lt; .001)<br/> ↑<br/> Mean of the self-efficacy for limiting HIV risk behaviour score (p &lt; .001)</p>                                                                                       | Effective   | 2 | Medium |
| Mason-Jones, Mathews & Fisher 2011 | Non-randomised, intervention vs. control | South Africa | 2339 | Sex education | <p style="text-align: center;">↑<br/> Not had sex (p=0.002)<br/> ↔<br/> First age sex (p=0.84)<br/> ↔<br/> Used a condom at last sex (p=0.32)<br/> ↔<br/> Goal orientation (p=0.20)<br/> ↔<br/> Decision-making (p=0.58)<br/> ↔<br/> Future orientation score (p=0.32)</p>     | Ineffective | 3 | High   |
| Mellanby et al. 2001               | Non-randomised, peer-led vs. adult-led   | UK           | 1320 | Sex education | <p style="text-align: center;">↓<br/> Knowledge of STDs (greater increase in adult-led, p &lt; 0.001)<br/> ↔<br/> Assertiveness score (p = 0.32)<br/> ↑<br/> Attitude scores (p &lt; 0.001)</p>                                                                                | Ineffective | 3 | Medium |



|                                   |                                                           |          |      |               |                                                                                                                                                                                                                                                                                                                                                                                                                               |             |   |        |
|-----------------------------------|-----------------------------------------------------------|----------|------|---------------|-------------------------------------------------------------------------------------------------------------------------------------------------------------------------------------------------------------------------------------------------------------------------------------------------------------------------------------------------------------------------------------------------------------------------------|-------------|---|--------|
|                                   |                                                           |          |      |               | <p>↓<br/>Involvement in sessions (greater in adult-led, <math>p = 0.016</math>)</p> <p>↓<br/>Feeling embarrassed (greater in peer-led, <math>p = &lt;0.001</math>)</p> <p>↔<br/>Talking to others about the sessions (<math>p=0.12</math>)</p>                                                                                                                                                                                |             |   |        |
| Menna et al. 2015                 | Non-randomised, intervention vs. control                  | Ethiopia | 560  | Sex education | <p>↑<br/>Knowledge of HIV (<math>p=0.004</math>)</p> <p>↔<br/>Ever initiated sexual intercourse (<math>p=0.72</math>)</p> <p>↔<br/>Ever tested for HIV (0.53)</p> <p>↑<br/>Limiting sexual partner only to one in last 12 months (<math>p=0.21</math>)</p> <p>↔<br/>Consistent use of condom in last 12 months (<math>p=0.24</math>)</p> <p>↑<br/>Willingness to go for HIV counselling and testing (<math>p=0.01</math>)</p> | Mixed       | 3 | Medium |
| Merakou & Kourea-Kremastinou 2006 | Non-randomised, intervention vs. control                  | Greece   | 702  | Sex education | <p>↑<br/>Increased personal responsibility</p> <p>↑<br/>Safer behaviour in sexual practice</p> <p>↔<br/>Knowledge</p>                                                                                                                                                                                                                                                                                                         | Effective   | 1 | Low    |
| Michielsen et al. 2012            | Non-randomised controlled trial, intervention vs. control | Rwanda   | 1400 | Sex education | <p>↔<br/>Sexual risk behaviour (NS)</p> <p>↔<br/>Increased knowledge (NS)</p> <p>↔<br/>Perceived severity (NS)</p> <p>↔<br/>Perceived susceptibility (NS)</p>                                                                                                                                                                                                                                                                 | Ineffective | 3 | Medium |

|                            |                                                              |        |      |               |                                                                                                                                                                                                                                                                                                                          |           |   |        |
|----------------------------|--------------------------------------------------------------|--------|------|---------------|--------------------------------------------------------------------------------------------------------------------------------------------------------------------------------------------------------------------------------------------------------------------------------------------------------------------------|-----------|---|--------|
|                            |                                                              |        |      |               | ↑<br>Stigma ( $p=0.05$ )                                                                                                                                                                                                                                                                                                 |           |   |        |
| Ozcebe, Akin & Aslan, 2004 | Non-randomised, pre-post survey                              | Turkey | 369  | Sex education | ↑<br>HIV/AIDS knowledge scores ( $p < .001$ )                                                                                                                                                                                                                                                                            | Effective | 4 | High   |
| Parweij, 2005              | Randomised, peer-led vs. nurse-led                           | India  | 273  | Sex education | ↑<br>Reproductive health domains<br>↑<br>Reproductive health knowledge<br>(See full paper for full list of individual statements)                                                                                                                                                                                        | Effective | 3 | Medium |
| Rotz et al. 2018           | Matched comparison group design, intervention vs. comparison | USA    | 1522 | Sex education | ↔<br>Rates of sexual activity ( $p=.83$ )<br>↔<br>Rates of unprotected sex ( $p=.93$ )<br>↑<br>Exposure to information about sexual health topics ( $p < .01$ )<br>↑<br>Knowledge of preventing pregnancy and transmission of STIs ( $p < .01$ )                                                                         | Mixed     | 3 | Medium |
| Siegel et al. 1998         | Non-randomised, intervention vs. control                     | USA    | 3635 | Sex education | <b>Postintervention Knowledge Scores:</b><br>↑<br>Middle School: Boys ( $p < .001$ )<br>↑<br>Middle School: Girls ( $p < .001$ )<br>↑<br>High School Boys ( $p < .001$ )<br>↑<br>High School Girls ( $p < .001$ )<br><br><b>Self-efficacy Scores:</b><br>↔<br>Middle School: Boys (NS)<br>↔<br>Middle School: Girls (NS) | Effective | 3 | Medium |

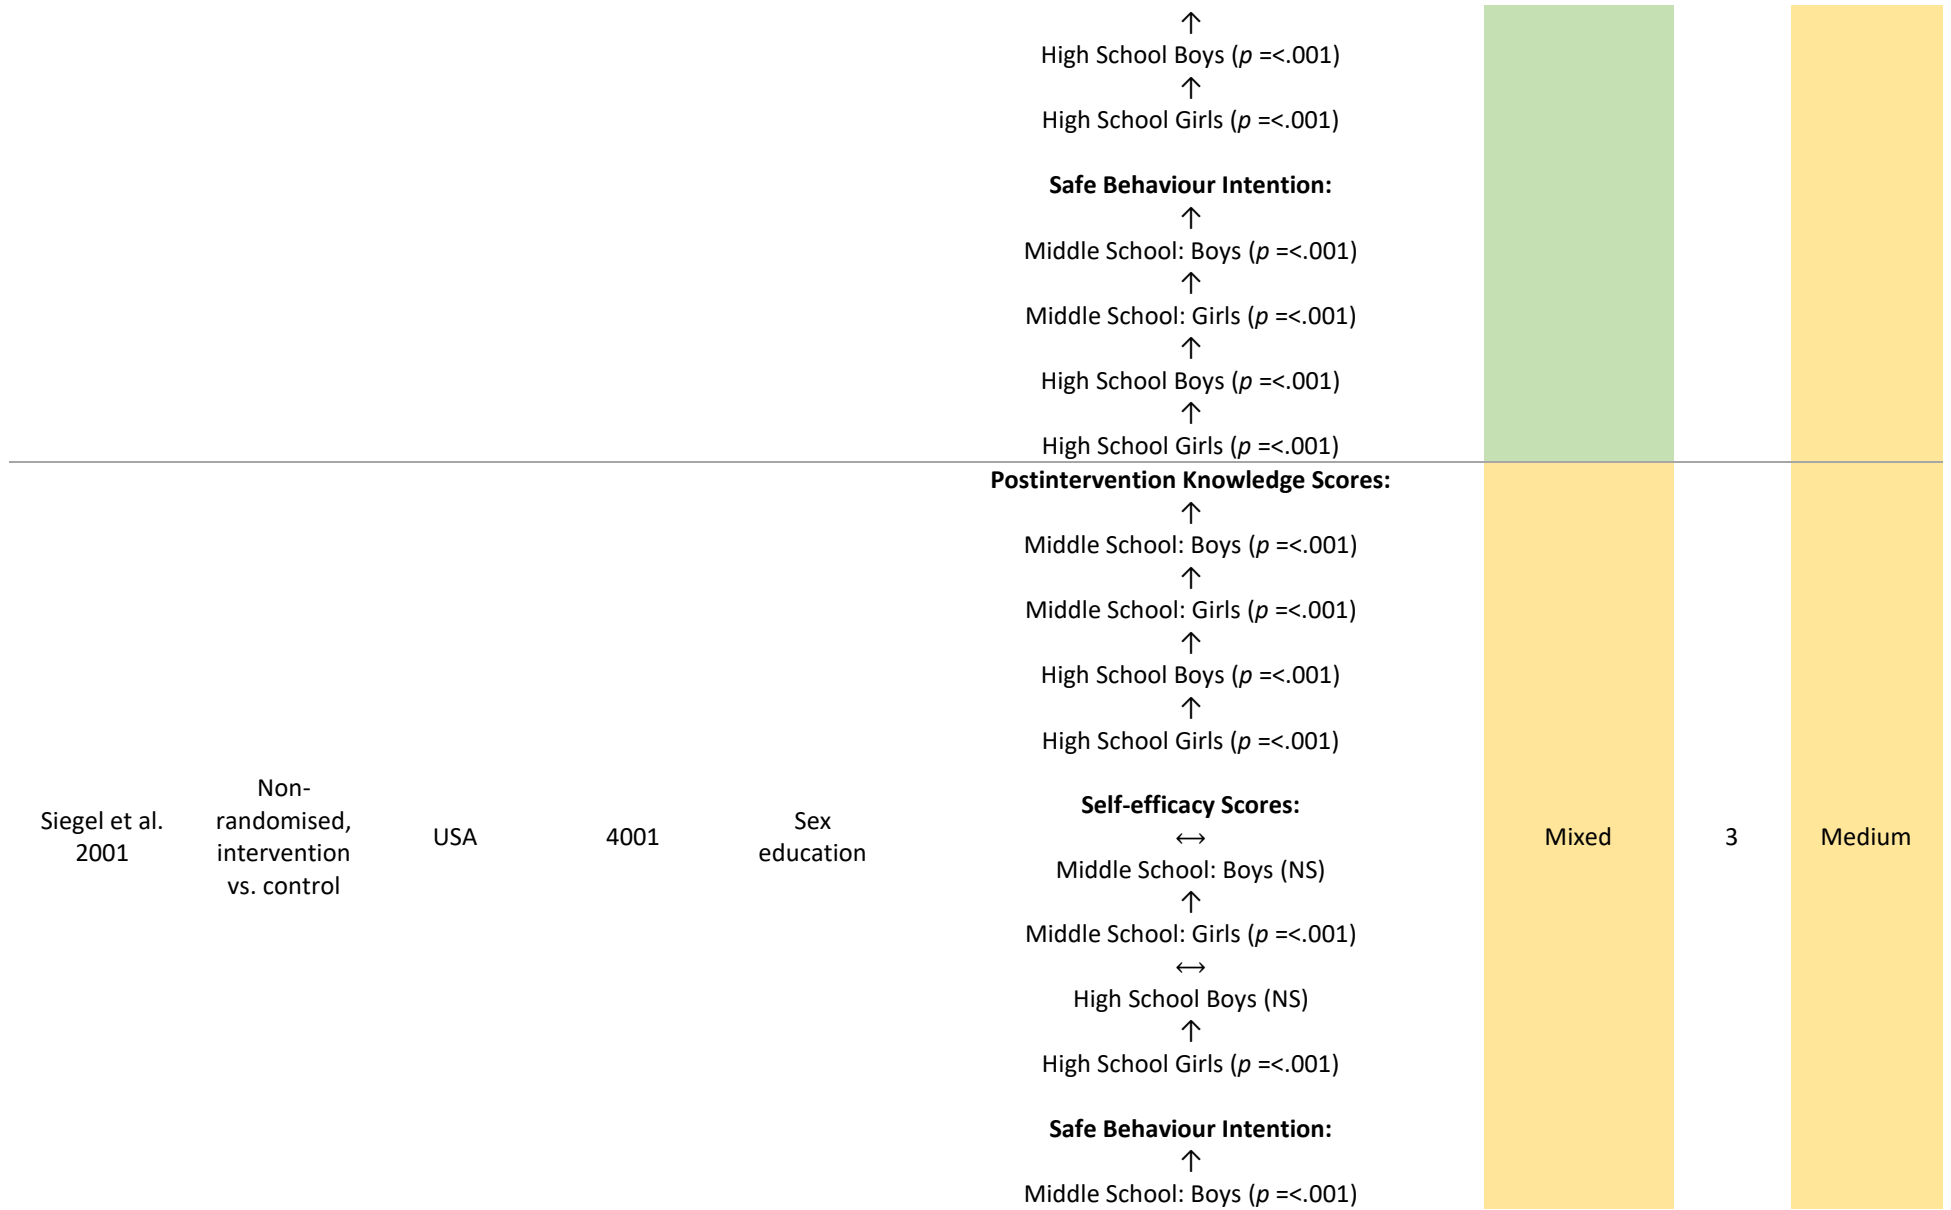

|                        |                                                                  |              |      |               |                                                                                                                                                                                                                                                                                  |             |   |        |
|------------------------|------------------------------------------------------------------|--------------|------|---------------|----------------------------------------------------------------------------------------------------------------------------------------------------------------------------------------------------------------------------------------------------------------------------------|-------------|---|--------|
|                        |                                                                  |              |      |               | ↔<br>Middle School: Girls (NS)<br>↔<br>High School Boys (NS)<br>↔<br>High School Girls (NS)                                                                                                                                                                                      |             |   |        |
| Stephenson et al. 2004 | Cluster-randomised trial, intervention vs. control (teacher-led) | UK           | 9508 | Sex education | ↑<br>Girls: Unprotected sex before age 16 ( $p=0.0008$ )<br>↔<br>Boys: Unprotected sex before age 16 ( $p=0.35$ )<br>↑<br>Girls: Knowledge of methods to prevent STIs ( $p=0.002$ )<br>↔<br>Boys: Knowledge of methods to prevent STIs (NS)                                      | Mixed       | 3 | Medium |
| Stephenson et al. 2008 | Cluster-randomised trial, intervention vs. control (teacher-led) | UK           | 9000 | Sex education | ↔<br>Proportion of girls with one or more abortions by age 20 y (NS)<br>↔<br>Proportion of girls who had had sex by age 18.0 y (NS)<br>↔<br>Proportion of girls who had one or more live births by age 20.5 (NS)                                                                 | Ineffective | 3 | Medium |
| Timol et al. 2016      | Randomised, intervention vs. control                             | South Africa | 2904 | Sex education | ↑<br>Sensation seeking ( $p < .05$ )<br>↑<br>Self-efficacy in sexual relations ( $p < .05$ )<br>↑<br>Future orientation ( $p < .05$ )<br>↑<br>HIV transmission knowledge ( $p < .01$ )<br>↑<br>HIV prevention knowledge ( $p < .01$ )<br>↑<br>Health relationships ( $p < .05$ ) | Effective   | 3 | Medium |

|              |                                          |              |      |               |                                                                                             |             |   |     |
|--------------|------------------------------------------|--------------|------|---------------|---------------------------------------------------------------------------------------------|-------------|---|-----|
| Visser, 2007 | Non-randomised, intervention vs. control | South Africa | 4086 | Sex education | ↔<br>Psychological wellbeing (NS)<br>↔<br>Personal control (NS)<br>↔<br>School climate (NS) | Ineffective | 1 | Low |
|--------------|------------------------------------------|--------------|------|---------------|---------------------------------------------------------------------------------------------|-------------|---|-----|

↑ = improvement; ↓ = negative effect for peer education; ↔ = no effect

NS = no significant change where p-value is not reported

Effective = ≥60% outcomes with a positive finding; Mixed = 41-59% outcomes with a positive finding; Ineffective = ≥40% outcomes with a positive finding

High quality = 4-5; Medium quality = 2-3; Low quality = 0-1 (using the Mixed Methods Appraisal Tool, MMAT)

**Supplementary Material 2: Full table of included study details, effectiveness and quality ratings for peer educator outcomes**

| Author, Year                      | Study Design                                                  | Nation    | Sample Size | Health area                     | Outcome and effectiveness                                                                                                                                                                                                                                                                                                            | Effectiveness | Quality Score | Quality Rating | Standalone paper?* |
|-----------------------------------|---------------------------------------------------------------|-----------|-------------|---------------------------------|--------------------------------------------------------------------------------------------------------------------------------------------------------------------------------------------------------------------------------------------------------------------------------------------------------------------------------------|---------------|---------------|----------------|--------------------|
| Audrey, Holliday & Campbell, 2006 | Cluster randomised controlled trial, intervention vs. control | UK        | 10,730      | Alcohol, smoking, substance use | Smoking prevalence at 1-year follow-up<br>↑<br>'High risk group' ( $p = 0.045$ )<br>↔<br>Never smoked ( $p = 0.20$ )<br>↔<br>Regular (weekly) smokers ( $p = 0.68$ )                                                                                                                                                                 | Ineffective   | 5             | High           | Yes                |
| Zambuto et al. 2019               | Non-randomised, pre-post survey                               | Italy     | 524         | Bullying                        | ↑ ↔<br>Victimization ( $p = .015$ males, $p = .093$ females)<br>↔ ↔<br>Bullying ( $p = .068$ males, $p = .854$ females)<br>↑ ↔<br>Prosocial behaviour ( $p = .002$ males, $p = .455$ females)<br>↑ ↔<br>Social support ( $p = .036$ males, $p = .627$ females)<br>↔ ↑<br>Defending Behaviour ( $p = .925$ males, $p = .015$ females) | Ineffective   | 3             | Medium         | Yes                |
| Acemoglu, 2011                    | Non-randomised, pre-post survey                               | Turkey    | 2930        | Disease prevention              | ↑<br>Knowledge scores ( $p = 0.000$ )                                                                                                                                                                                                                                                                                                | Effective     | 3             | Medium         | No                 |
| Foley et al. 2017                 | Non-randomised, pre-post survey                               | Australia | 519         | Healthy lifestyles              | ↑<br>Eating $\geq 2$ serves fruit/day ( $p < 0.01$ )<br>↑<br>Eating $\geq 5$ serves vegetables/day                                                                                                                                                                                                                                   | Mixed         | 4             | High           | Yes                |

|                        |                                 |       |     |               |                                                                                                                                                                                                                                                                                                                                                                                                                                                                                                      |             |   |        |    |
|------------------------|---------------------------------|-------|-----|---------------|------------------------------------------------------------------------------------------------------------------------------------------------------------------------------------------------------------------------------------------------------------------------------------------------------------------------------------------------------------------------------------------------------------------------------------------------------------------------------------------------------|-------------|---|--------|----|
|                        |                                 |       |     |               | <p>(<math>p = &lt;0.01</math>)<br/>↔<br/>Breakfast everyday (<math>p = 0.053</math>)<br/>↑<br/>Drinking &lt;1 cup/day of Sugar sweetened beverages (<math>p = &lt;0.01</math>)<br/>↔<br/>Screen Time <math>\leq 2</math> h/day (<math>p = 0.592</math>)<br/>↔<br/>Moderate-to-vigorous physical exercise <math>\geq 60</math> min/day (<math>p = &lt; 0.076</math>)</p>                                                                                                                              |             |   |        |    |
| Eisenstein et al. 2019 | Non-randomised, pre-post survey | UK    | 950 | Mental health | <p>↑<br/>Understanding of key terms (<math>p = 0.04</math>)<br/>↑<br/>Key skills (<math>p = &lt;0.001</math>)<br/>↔<br/>Confidence to talk about mental health (<math>p = 0.08</math>)<br/>↑<br/>Knowledge of information and resources (<math>p = 0.02</math>)<br/>↔<br/>Readiness to support others (<math>p = 0.8</math>)<br/>↔<br/>Emotional difficulties (<math>p = 0.24</math>)<br/>↔<br/>Behavioural difficulties (<math>p = 0.65</math>)<br/>↔<br/>School climate (<math>p = 0.5</math>)</p> | Ineffective | 2 | Medium | No |
| Parikh et al. 2018     | Non-randomised, pre-post survey | India | 878 | Mental health | <p>↑<br/>Confidence in identifying peers with depression (<math>p = 0.036</math>)<br/>↑<br/>Confidence in referring peers with depression (<math>p = 0.023</math>)<br/>↓</p>                                                                                                                                                                                                                                                                                                                         | Ineffective | 1 | Low    | No |

|                   |                                                |     |      |               |                                                                                                                                                                                                                                                                                                                                                                                                                                                                             |           |   |      |     |
|-------------------|------------------------------------------------|-----|------|---------------|-----------------------------------------------------------------------------------------------------------------------------------------------------------------------------------------------------------------------------------------------------------------------------------------------------------------------------------------------------------------------------------------------------------------------------------------------------------------------------|-----------|---|------|-----|
|                   |                                                |     |      |               | Knowing whether to tell someone if a friend informs them they are suicidal (NS)<br>↓<br>Feelings about visiting school social worker/psychologist (NS)<br>↓<br>Depression knowledge questions (NS)<br>↓<br>Knowledge of depression symptoms ( $p = 0.07$ )<br>↑<br>Attitudes to a new student with depression (NS)<br>↓<br>Comfort speaking to other students about mental health ( $p < 0.001$ )<br>↑<br>Willingness to confide in authority figures: peer educators: (NS) |           |   |      |     |
| Wyman et al. 2010 | Randomised, intervention vs. wait-list control | USA | 4128 | Mental health | ↑<br>Help for suicidal peers ( $p < .001$ )<br>↑<br>Rejects codes of silence ( $p = .002$ )<br>↑<br>Maladaptive coping ( $p = .013$ )<br>↑<br>Help-seeking from adults ( $p < .001$ )<br>↑<br>Sources of Strength coping ( $p = .002$ )<br>↑<br>School engagement ( $p = .043$ )<br>↑<br>Trusted adults ( $p < .001$ )<br>↑                                                                                                                                                 | Effective | 4 | High | Yes |



|                   |                                          |        |      |               |                                                                                          |           |   |        |    |
|-------------------|------------------------------------------|--------|------|---------------|------------------------------------------------------------------------------------------|-----------|---|--------|----|
|                   |                                          |        |      |               | Referred distressed peers ( $p=.08$ )<br>↔                                               |           |   |        |    |
|                   |                                          |        |      |               | Support to peers ( $p=.015$ )<br>↑                                                       |           |   |        |    |
|                   |                                          |        |      |               | Postponing sexual intercourse: Attitude direct ( $p < 0.001$ )<br>↑                      |           |   |        |    |
|                   |                                          |        |      |               | Postponing sexual intercourse: Attitude indirect ( $p < 0.001$ )<br>↑                    |           |   |        |    |
|                   |                                          |        |      |               | Postponing sexual intercourse: Perceived behavioural control direct ( $p < 0.001$ )<br>↑ |           |   |        |    |
|                   |                                          |        |      |               | Postponing sexual intercourse: personal normative beliefs ( $p = 0.01$ )<br>↑            |           |   |        |    |
| Caron et al. 2004 | Non-randomised, intervention vs. control | Canada | 1004 | Sex education | Postponing sexual intercourse: Role beliefs ( $p < 0.001$ )<br>↑                         | Effective | 3 | Medium | No |
|                   |                                          |        |      |               | Postponing sexual intercourse: Perceived self-efficacy ( $p < 0.001$ )<br>↑              |           |   |        |    |
|                   |                                          |        |      |               | Postponing sexual intercourse: Anticipated regret ( $p < 0.001$ )<br>↑                   |           |   |        |    |
|                   |                                          |        |      |               | Condom use: behavioural control indirect ( $p < 0.001$ )<br>↑                            |           |   |        |    |
|                   |                                          |        |      |               | Condom use: perceived self-efficacy ( $p < 0.001$ )<br>↑                                 |           |   |        |    |
|                   |                                          |        |      |               | Condom use: attitude direct measures ( $p = 0.05$ )<br>↑                                 |           |   |        |    |
|                   |                                          |        |      |               | Condom use: attitude indirect measure                                                    |           |   |        |    |

|                   |                             |     |     |               |                                                                                                                                                                                                                                                                                                                                                                                                                                                                                                          |             |   |     |     |
|-------------------|-----------------------------|-----|-----|---------------|----------------------------------------------------------------------------------------------------------------------------------------------------------------------------------------------------------------------------------------------------------------------------------------------------------------------------------------------------------------------------------------------------------------------------------------------------------------------------------------------------------|-------------|---|-----|-----|
|                   |                             |     |     |               | <p>(<math>p = 0.05</math>)<br/> ↑<br/> Condom use: personal normative beliefs<br/> (<math>p = 0.01</math>)<br/> ↑<br/> Condom use: anticipated regret<br/> (<math>p = 0.03</math>)<br/> ↑<br/> Condom use: perceived behavioural control direct measure (<math>p = 0.01</math>)<br/> ↑<br/> Condom use: role beliefs (<math>p = 0.05</math>)<br/> ↑<br/> Condom use: intention (<math>p = 0.02</math>)</p>                                                                                               |             |   |     |     |
|                   |                             |     |     |               | <p>↑<br/> Had talked to their parents about the use of alcohol (<math>p &lt; .05</math>)<br/> ↓<br/> Report having unwanted sex because they were intoxicated after the intervention (<math>p &lt; .05</math>)<br/> inferior<br/> ↔<br/> Individual Difference Variables (NS)<br/> ↔<br/> Knowledge (NS)<br/> ↔<br/> Parental Communication (NS)<br/> ↔<br/> Peer Norms (NS)<br/> ↔<br/> Self-efficacy (NS)<br/> ↔<br/> Intentions to Have Sex (NS)<br/> ↔<br/> Self-reported behaviours (NS)<br/> ↔</p> |             |   |     |     |
| Ebreo et al. 2002 | Randomised, pre-post survey | USA | 845 | Sex education |                                                                                                                                                                                                                                                                                                                                                                                                                                                                                                          | Ineffective | 1 | Low | Yes |

|                                 |                                                       |     |     |               |                                                                                         |             |   |        |     |
|---------------------------------|-------------------------------------------------------|-----|-----|---------------|-----------------------------------------------------------------------------------------|-------------|---|--------|-----|
|                                 |                                                       |     |     |               | Student Course Evaluations (NS)                                                         |             |   |        |     |
|                                 |                                                       |     |     |               | ↔                                                                                       |             |   |        |     |
|                                 |                                                       |     |     |               | Knowledge ( $p = 0.10$ )                                                                |             |   |        |     |
|                                 |                                                       |     |     |               | ↔                                                                                       |             |   |        |     |
|                                 |                                                       |     |     |               | Parental communication ( $p=0.46$ )                                                     |             |   |        |     |
|                                 |                                                       |     |     |               | ↔                                                                                       |             |   |        |     |
| Jennings et al. 2014            | Non-randomised intervention vs. control               | USA | 160 | Sex education | Self-efficacy ( $p=0.06$ )                                                              | Ineffective | 4 | High   | No  |
|                                 |                                                       |     |     |               | ↔                                                                                       |             |   |        |     |
|                                 |                                                       |     |     |               | Sexual health information ( $p=0.06$ )                                                  |             |   |        |     |
|                                 |                                                       |     |     |               | ↑                                                                                       |             |   |        |     |
|                                 |                                                       |     |     |               | Opportunity to practice skills ( $p=0.01$ )                                             |             |   |        |     |
|                                 |                                                       |     |     |               | ↑                                                                                       |             |   |        |     |
|                                 |                                                       |     |     |               | Intentions ( $p=0.04$ )                                                                 |             |   |        |     |
|                                 |                                                       |     |     |               | ↔                                                                                       |             |   |        |     |
|                                 |                                                       |     |     |               | Knowledge; condoms ( $p = 0.109$ )                                                      |             |   |        |     |
|                                 |                                                       |     |     |               | ↔                                                                                       |             |   |        |     |
|                                 |                                                       |     |     |               | Knowledge; the Pill ( $p = 0.089$ )                                                     |             |   |        |     |
|                                 |                                                       |     |     |               | ↑                                                                                       |             |   |        |     |
|                                 |                                                       |     |     |               | Knowledge; femidom ( $p = 0.000$ )                                                      |             |   |        |     |
|                                 |                                                       |     |     |               | ↑                                                                                       |             |   |        |     |
|                                 |                                                       |     |     |               | Knowledge; emergency contraception – ( $p = 0.026$ )                                    |             |   |        |     |
|                                 |                                                       |     |     |               | ↑                                                                                       |             |   |        |     |
|                                 |                                                       |     |     |               | Knowledge; cap ( $p = 0.000$ )                                                          |             |   |        |     |
|                                 |                                                       |     |     |               | ↑                                                                                       |             |   |        |     |
| Strange, Forrest & Oakley, 2002 | Randomised controlled trial, intervention vs. control | UK  | 331 | Sex education | Knowledge; coil ( $p = 0.000$ )                                                         | Mixed       | 2 | Medium | Yes |
|                                 |                                                       |     |     |               | ↔                                                                                       |             |   |        |     |
|                                 |                                                       |     |     |               | Attitude; sex before marriage ( $p = 0.336$ )                                           |             |   |        |     |
|                                 |                                                       |     |     |               | ↑                                                                                       |             |   |        |     |
|                                 |                                                       |     |     |               | Attitude; people having sex with someone the first time they meet them: ( $p = 0.002$ ) |             |   |        |     |
|                                 |                                                       |     |     |               | ↑                                                                                       |             |   |        |     |
|                                 |                                                       |     |     |               | Attitude; two men having sex with each other ( $p = 0.01$ )                             |             |   |        |     |
|                                 |                                                       |     |     |               | ↑                                                                                       |             |   |        |     |

|                                                                                                                                                                                             |  |  |
|---------------------------------------------------------------------------------------------------------------------------------------------------------------------------------------------|--|--|
| Attitude; two women having sex with each other ( $p=0.003$ )<br>$\leftrightarrow$<br>Attitude; abortion ( $p=0.7815$ )<br>$\leftrightarrow$<br>Attitude; using contraception ( $p=0.2414$ ) |  |  |
|---------------------------------------------------------------------------------------------------------------------------------------------------------------------------------------------|--|--|

$\uparrow$  = improvement;  $\downarrow$  = negative effect for peer education;  $\leftrightarrow$  no effect

NS = no significant change where p-value is not reported

**Effective** =  $\geq 60\%$  outcomes with a positive finding; **Mixed** = 41-59% outcomes with a positive finding; **Ineffective** =  $\geq 40\%$  outcomes with a positive finding

**High quality** = 4-5; **Medium quality** = 2-3, **Low quality** = 0-1 (using the Mixed Methods Appraisal Tool, MMAT)

\*Standalone paper: a paper that reported peer educator outcomes only rather than peer learner and peer educator outcomes

### Supplementary Material 3: Example Search Strategy (Medline)

| Search terms pertaining to schools and school students                                                                                                                                                                                                                                                                                                                                                                                                                                                                                                                                                      | Search terms pertaining to peer education                                                                                                                                                                                                                                                                                                                                                                                                                                               | Search terms pertaining to health-related interventions, health-related outcome domains                                                                                                                                                                                                                                                                                                                                                                                                                                                                                                                                                                                                                                                                                                                                                                                                                                                                                                                                                                                                                                                                                                                                                                                                                                                                                                                                           |
|-------------------------------------------------------------------------------------------------------------------------------------------------------------------------------------------------------------------------------------------------------------------------------------------------------------------------------------------------------------------------------------------------------------------------------------------------------------------------------------------------------------------------------------------------------------------------------------------------------------|-----------------------------------------------------------------------------------------------------------------------------------------------------------------------------------------------------------------------------------------------------------------------------------------------------------------------------------------------------------------------------------------------------------------------------------------------------------------------------------------|-----------------------------------------------------------------------------------------------------------------------------------------------------------------------------------------------------------------------------------------------------------------------------------------------------------------------------------------------------------------------------------------------------------------------------------------------------------------------------------------------------------------------------------------------------------------------------------------------------------------------------------------------------------------------------------------------------------------------------------------------------------------------------------------------------------------------------------------------------------------------------------------------------------------------------------------------------------------------------------------------------------------------------------------------------------------------------------------------------------------------------------------------------------------------------------------------------------------------------------------------------------------------------------------------------------------------------------------------------------------------------------------------------------------------------------|
| <p>( MH "Schools" ) OR TI ( "Elementary School*" OR "Primary School*" OR "Junior School*" OR "Junior High School" OR "Secondary School*" OR "Middle School*" OR "Sixth Form*" OR "High School*" OR "Primary education" OR "Secondary education" OR "Special Education*" OR "School-based" OR "school based" ) OR AB ( "Elementary School*" OR "Primary School*" OR "Junior School*" OR "Junior High School" OR "Secondary School*" OR "Middle School*" OR "Sixth Form*" OR "High School*" OR "Primary education" OR "Secondary education" OR "Special Education*" OR "School-based" OR "school based" )</p> | <p>TI ( "peer educat*" OR "peer-led" OR "Peer led" OR "Student-led" OR "Student led" OR "Peer teach*" OR "Peer Intervention*" OR "Cross-age" or "Cross age" or "Peer to Peer" or "Peer-to-Peer" OR "Peer-delivered" or "Peer Delivered" ) OR AB ( "peer educat*" OR "peer-led" OR "PEER LED" OR "STUDENT-LED" OR "STUDENT LED" OR "PEER TEACH*" OR "Peer Intervention*" OR "Cross-age" or "Cross age" or "Peer to Peer" or "Peer-to-Peer" OR "Peer-delivered" or "Peer Delivered" )</p> | <p>MH ( "Health Education+" OR "Health Literacy+" OR "Health promotion" OR "School Health Services" OR "Preventive Health Services" OR "School Mental Health Services" OR "Anxiety" OR "Self Concept" OR "Depression" OR "Emotional Intelligence" OR "Psychological Distress" OR "Adaptation, Psychological" OR "Sex Education" OR "Sexual Behavior" OR "Safe Sex" OR "Tobacco Use" OR "Underage Drinking" OR "Alcoholism" OR "Substance-Related Disorders" OR "Substance Abuse, Intravenous" OR "Risk Reduction Behavior" OR "Impulsive Behavior" OR "Risk-Taking" OR "Health Risk Behaviors" OR "Health Behavior" ) OR TI ( "Health Promotion" OR "Health Literacy" OR "health education" OR "School Based Intervention*" OR "Group Intervention*" OR "Smoking" OR "Drug abuse" OR "Substance abuse" OR "Drug education" OR "alcohol*" OR "Mental health" OR "Esteem" OR "Confidence" OR "Emotional" OR "behaviour*" OR "Depression" or "anxiety" OR "Sex education" OR "Safe sex" OR "RISK TAKING" OR "HEALTH RISK*" ) OR AB ( "Health Promotion" OR "Health Literacy" OR "health education" OR "School Based Intervention*" OR "Group Intervention*" OR "Smoking" OR "Drug abuse" OR "Substance abuse" OR "Drug education" OR "alcohol*" OR "Mental health" OR "Esteem" OR "Confidence" OR "Emotional" OR "behaviour*" OR "Depression" or "anxiety" OR "Sex education" OR "Safe sex" OR "RISK TAKING" OR "HEALTH RISK*" )</p> |
